# Supplementary material
Source: PubMed Central journal article supplement (PMC3632458)
Supplement: 1510c55d9960fc94c701a9a92583fb0e_genetics.112.149104-2.pdf [file 1510c55d9960fc94c701a9a92583fb0e_genetics.112.149104-2.pdf]

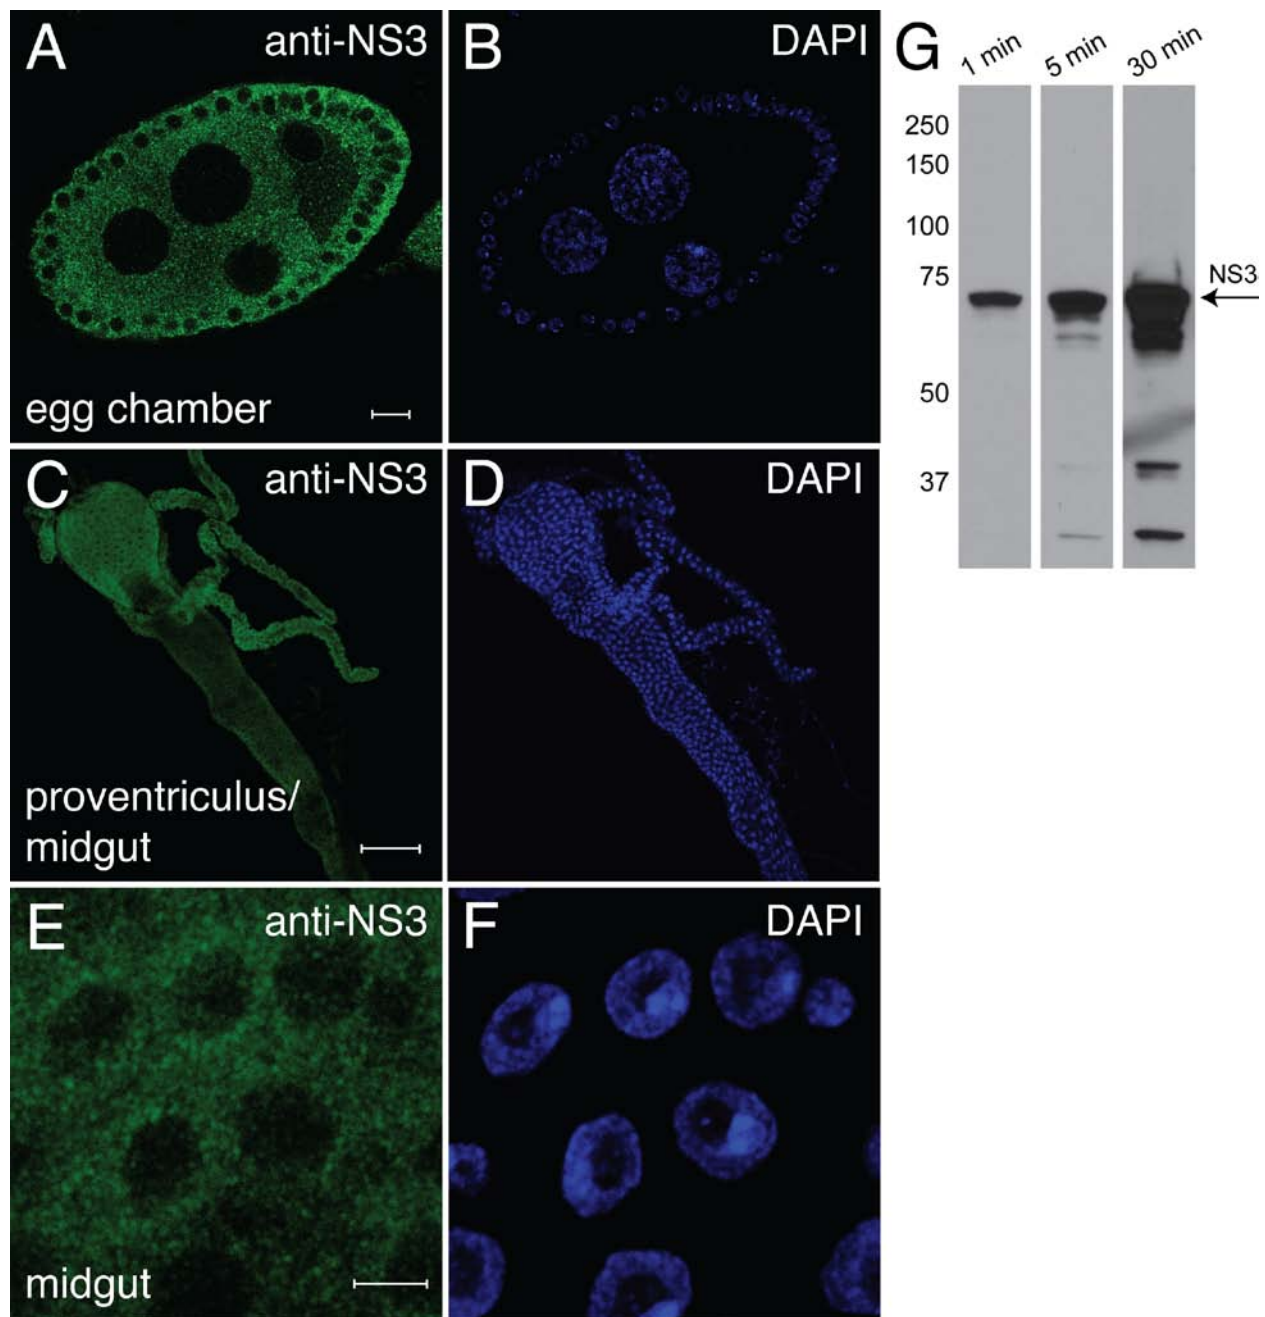

**Figure S1 NS3 localization in the ovary/egg chamber, proventriculus, and midgut.** **A, B.** NS3 staining in an egg chamber (stage 8) from a wild-type female demonstrating cytoplasmic enrichment and localization to the periphery of the germinal vesicle. Image captured with a 40X objective at 2X optical zoom. Scale bar in A represents 10 $\mu$ m. **C, D.** NS3 staining in the proventriculus and midgut of a second-instar wild-type larva. NS3 protein is more abundant in the proventriculus than the midgut, yet cytoplasmic in both tissues. Image captured with a 20X objective; the scale bar in E indicates 100 $\mu$ m. **E, F.** NS3 protein in the midgut illustrating cytoplasmic localization and perinuclear enrichment. Image captured with a 63X objective and 8X optical zoom. Scale bar in E indicates 5 $\mu$ m. **G.** Western analysis of embryonic protein extract with the NS3 antibody. The 1 min film exposure reveals that the antibody primarily recognizes NS3 (70kDa) and other minor epitopes become apparent upon longer exposures (5 and 30 min).
