# Supplementary material
Source: PubMed Central journal article supplement (PMC3632458)
Supplement: 3546f34defab0e15a94efc2851b1e121_genetics.112.149104-1.pdf [file 3546f34defab0e15a94efc2851b1e121_genetics.112.149104-1.pdf]

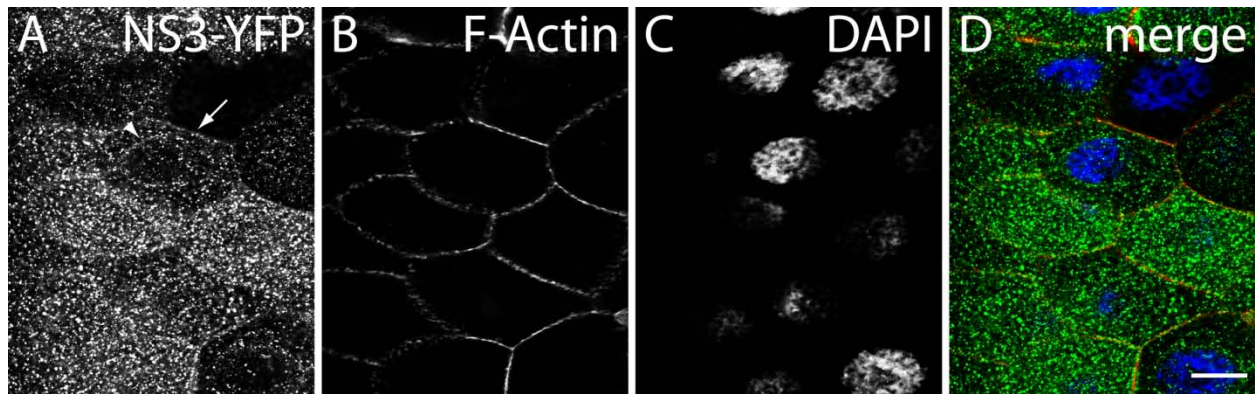

**Figure S2 NS3-YFP localizes to cytoplasmic puncta and is enriched proximal to the nuclear envelope and cellular membrane of salivary glands. A-D.** NS3-YFP was expressed in salivary glands via *c061-gal4*, a driver that is active at variable levels in cells of the salivary glands. **(A)** NS3-YFP exists within cytoplasmic puncta and is enriched at the nuclear periphery (arrow head) and proximal to the cellular membrane (arrow). **(B)** F-Actin was detected via AlexaFluor conjugated phalloidin to visualize cell exteriors. **(C)** Dapi staining to visualize DNA within the nucleus. **(D)** Merged image of NS3-YFP (green), F-Actin (red), and Dapi (blue) staining. Note the co-localization of NS3-YFP and F-Actin at the cell membrane. Scale bar = 50  $\mu$ m.
